# Supplementary material for: Reward regulation in plant–frugivore networks requires only weak cues
Source: PubMed Central journal article supplement (PMC6240120; doi:10.1038/s41467-018-07362-z), 2018-11-16
Supplement: 41467_2018_7362_MOESM1_ESM.pdf [file 41467_2018_7362_MOESM1_ESM.pdf]

## Supplementary Information

Reward regulation in plant–frugivore networks requires only weak cues

Albrecht et al.

**Supplementary Table 1. Summary of sampling effort across the ten networks in each site and season.**

| Site | Season | Observation hours [h] | Plant species richness | Animal species richness | Visitation rate per hour | Fruit consumption rate per hour | Total number of recorded visits | Total number of estimated fruit consumption events |
|------|--------|-----------------------|------------------------|-------------------------|--------------------------|---------------------------------|---------------------------------|----------------------------------------------------|
| DE   | DJF    | 294.0                 | 10                     | 7                       | 34.53                    | 117.67                          | 430                             | 1165                                               |
| DE   | JJA    | 444.0                 | 19                     | 22                      | 117.64                   | 426.56                          | 2100                            | 8293                                               |
| DE   | MAM    | 75.0                  | 3                      | 6                       | 10.51                    | 45.58                           | 272                             | 1127                                               |
| DE   | SON    | 627.0                 | 21                     | 25                      | 103.12                   | 402.75                          | 3550                            | 21204                                              |
| GB   | DJF    | 469.3                 | 18                     | 15                      | 231.95                   | 1157.72                         | 6273                            | 30498                                              |
| GB   | JJA    | 439.9                 | 22                     | 18                      | 93.43                    | 363.62                          | 2391                            | 9225                                               |
| GB   | MAM    | 241.1                 | 7                      | 10                      | 21.59                    | 122.69                          | 1840                            | 12841                                              |
| GB   | SON    | 915.6                 | 23                     | 23                      | 149.50                   | 773.96                          | 10036                           | 58870                                              |
| PL   | JJA    | 2166.0                | 13                     | 26                      | 29.53                    | 95.17                           | 4852                            | 13654                                              |
| PL   | SON    | 768.0                 | 8                      | 13                      | 10.93                    | 37.06                           | 1222                            | 2712                                               |

Given are for each network the study site on which observations were conducted (PL, Poland, Albrecht et al.<sup>1</sup>; DE, Germany, Stiebel & Bairlein<sup>2</sup>; GB, Great Britain, Snow & Snow<sup>3</sup>), the season during which observations were conducted (MAM, March to May; JJA, June to August; SON, September to November; DJF, December to February), the number of observation hours (h), the number of plant and animal species in the network, the total visitation and fruit consumption rate per hour in the network, as well as the total number of recorded visits and the estimated total number of fruits consumed in the network.

**Supplementary Table 2. Variance explained by fixed and random effects in the Bayesian hierarchical structural equation model testing whether the fruit choice of frugivorous birds is mediated by fruit colour and whether the birds' mean intake of particular nutrients is related to their partner diversity, interaction strength and migratory behaviour (see Table 2 in main text).**

| Response variable | Source of variance      |                      |                        |                     |                     |                            |
|-------------------|-------------------------|----------------------|------------------------|---------------------|---------------------|----------------------------|
|                   | $r^2_{\text{marginal}}$ | $r^2_{\text{phylo}}$ | $r^2_{\text{species}}$ | $r^2_{\text{site}}$ | $r^2_{\text{time}}$ | $r^2_{\text{conditional}}$ |
| $x$               | 0.0025                  | 0.014                | 0.017                  | 0.38                | 0.34                | 0.75                       |
| $y$               | 0.015                   | 0.043                | 0.023                  | 0.26                | 0.44                | 0.78                       |
| $z$               | 0.022                   | 0.031                | 0.018                  | 0.29                | 0.24                | 0.6                        |
| $a$               | 0.17                    | 0.037                | 0.088                  | 0.1                 | 0.25                | 0.65                       |
| Lipid             | 0.14                    | 0.039                | 0.044                  | 0.091               | 0.47                | 0.78                       |
| Sugar             | 0.091                   | 0.018                | 0.053                  | 0.31                | 0.16                | 0.63                       |
| Protein           | 0.041                   | 0.021                | 0.0068                 | 0.4                 | 0.32                | 0.79                       |
| Anthocyanin       | 0.48                    | 0.0042               | 0.0065                 | 0.18                | 0.2                 | 0.86                       |

The structural equation model tested for direct and indirect effects of the partner diversity and interaction strength of frugivores in the networks and their migratory distance on the colour profile of consumed fruits (i.e., chromatic colour components ( $x$ ,  $y$ ,  $z$ ) and the brightness ( $a$ ) in avian colour space; see Methods) and on the mean intake of particular nutrients (i.e., lipid, sugar, protein, anthocyanin). The sample size was  $n_{\text{obs}} = 165$  observations across  $n_{\text{species}} = 43$  bird species,  $n_{\text{site}} = 3$  study sites and  $n_{\text{time}} = 4$  seasons. Animal phylogeny, species, site and season were included as random factors. Given are  $r^2$ -values for the marginal variance ( $r^2_{\text{marginal}}$ ) explained by the fixed factors only, as well as the variance that is explained by each of the random factors ( $r^2_{\text{phylo}}$ ,  $r^2_{\text{species}}$ ,  $r^2_{\text{site}}$ ,  $r^2_{\text{time}}$ ), and the variance explained by the fixed and random factors combined ( $r^2_{\text{conditional}}$ ).

**Supplementary Table 3. Summary of Bayesian hierarchical structural equation model based on visitation rate per hour instead of fruit consumption rate per hour as ‘interaction currency’.**

| Response ~ predictor                             | Effect (95% CI)     | P    | BF    | Response ~ predictor                                     | Effect (95% CI)      | P    | BF    |
|--------------------------------------------------|---------------------|------|-------|----------------------------------------------------------|----------------------|------|-------|
| <i>x</i> ~<br>( $r_m^2 = 0.0029, r_c^2 = 0.74$ ) |                     |      |       | Lipid intake ~<br>( $r_m^2 = 0.16, r_c^2 = 0.78$ )       |                      |      |       |
| Partner diversity                                | -0.02 (-0.2, 0.04)  | 0.25 | -2.2  | Partner diversity                                        | 0.01 (-0.07, 0.2)    | 0.25 | -2.2  |
| Interaction strength                             | -0.01 (-0.2, 0.06)  | 0.22 | -2.6  | Interaction strength                                     | 0.1 (0, 0.3)         | 0.69 | 1.6   |
| Migratory distance                               | 0.01 (-0.05, 0.1)   | 0.23 | -2.5  | Migratory distance                                       | -0.002 (-0.1, 0.08)  | 0.19 | -2.9  |
|                                                  |                     |      |       | <i>x</i>                                                 | 0.003 (-0.09, 0.1)   | 0.19 | -2.9  |
|                                                  |                     |      |       | <i>y</i>                                                 | 0.3 (0.1, 0.4)       | 0.99 | 9.5*  |
|                                                  |                     |      |       | <i>z</i>                                                 | -0.01 (-0.2, 0.04)   | 0.22 | -2.6  |
|                                                  |                     |      |       | <i>a</i>                                                 | 0.5 (0.3, 0.6)       | 1.0  | >15*  |
| <i>y</i> ~<br>( $r_m^2 = 0.013, r_c^2 = 0.78$ )  |                     |      |       | Sugar intake ~<br>( $r_m^2 = 0.089, r_c^2 = 0.66$ )      |                      |      |       |
| Partner diversity                                | -0.09 (-0.3, 0)     | 0.54 | 0.30  | Partner diversity                                        | 0.08 (-0.01, 0.4)    | 0.45 | -0.41 |
| Interaction strength                             | -0.03 (-0.2, 0.07)  | 0.34 | -1.4  | Interaction strength                                     | -0.04 (-0.3, 0.04)   | 0.34 | -1.3  |
| Migratory distance                               | 0.06 (-0.04, 0.3)   | 0.41 | -0.74 | Migratory distance                                       | 0.003 (-0.08, 0.1)   | 0.19 | -2.9  |
|                                                  |                     |      |       | <i>x</i>                                                 | -0.1 (-0.6, 4e-04)   | 0.51 | 0.064 |
|                                                  |                     |      |       | <i>y</i>                                                 | -0.07 (-0.4, 0.01)   | 0.42 | -0.60 |
|                                                  |                     |      |       | <i>z</i>                                                 | -0.05 (-0.5, 0.1)    | 0.36 | -1.2  |
|                                                  |                     |      |       | <i>a</i>                                                 | -0.4 (-0.6, -0.2)    | 1.0  | 15*   |
| <i>z</i> ~<br>( $r_m^2 = 0.0088, r_c^2 = 0.58$ ) |                     |      |       | Protein intake ~<br>( $r_m^2 = 0.043, r_c^2 = 0.80$ )    |                      |      |       |
| Partner diversity                                | 0.005 (-0.08, 0.1)  | 0.22 | -2.6  | Partner diversity                                        | -0.05 (-0.3, 0.02)   | 0.38 | -0.97 |
| Interaction strength                             | 0.006 (-0.09, 0.1)  | 0.22 | -2.6  | Interaction strength                                     | -0.01 (-0.2, 0.07)   | 0.24 | -2.4  |
| Migratory distance                               | -0.06 (-0.3, 0.002) | 0.41 | -0.70 | Migratory distance                                       | -0.004 (-0.1, 0.07)  | 0.18 | -3.0  |
|                                                  |                     |      |       | <i>x</i>                                                 | 0.1 (-0.005, 0.5)    | 0.48 | -0.14 |
|                                                  |                     |      |       | <i>y</i>                                                 | 0.3 (0.1, 0.5)       | 0.99 | 10*   |
|                                                  |                     |      |       | <i>z</i>                                                 | 0.06 (-0.09, 0.4)    | 0.37 | -1.1  |
|                                                  |                     |      |       | <i>a</i>                                                 | 0.02 (-0.05, 0.2)    | 0.27 | -2.0  |
| <i>a</i> ~<br>( $r_m^2 = 0.14, r_c^2 = 0.64$ )   |                     |      |       | Anthocyanin intake ~<br>( $r_m^2 = 0.43, r_c^2 = 0.88$ ) |                      |      |       |
| Partner diversity                                | 0.3 (0.02, 0.5)     | 0.98 | 7.5*  | Partner diversity                                        | 0.08 (0, 0.2)        | 0.69 | 1.6   |
| Interaction strength                             | 0.03 (-0.05, 0.3)   | 0.27 | -2.0  | Interaction strength                                     | 0.01 (-0.05, 0.1)    | 0.24 | -2.3  |
| Migratory distance                               | -0.3 (-0.5, 0)      | 0.94 | 5.4*  | Migratory distance                                       | 0.007 (-0.005, 0.09) | 0.17 | -3.2  |
|                                                  |                     |      |       | <i>x</i>                                                 | 0.3 (0, 0.5)         | 0.94 | 5.5*  |
|                                                  |                     |      |       | <i>y</i>                                                 | 0.4 (0.2, 0.5)       | 1.0  | >15*  |
|                                                  |                     |      |       | <i>z</i>                                                 | 0.5 (0.3, 0.7)       | 1.0  | >15*  |
|                                                  |                     |      |       | <i>a</i>                                                 | -0.7 (-0.8, -0.6)    | 1.0  | >15*  |

The structural equation model tested for direct and indirect effects of the partner diversity and interaction strength of frugivores in the networks and their migratory distance on the colour profile of consumed fruits (i.e., chromatic colour components (*x*, *y*, *z*) and the brightness (*a*) in avian colour space; see Methods) and on the mean intake of particular nutrients (i.e., lipid, sugar, protein, anthocyanin). The sample size was  $n_{\text{obs}} = 165$  observations across  $n_{\text{species}} = 43$  bird species,  $n_{\text{site}} = 3$  study sites and  $n_{\text{time}} = 4$  seasons. Animal phylogeny, species, site and season were included as random factors. Given are posterior means (with shrinkage), 95% credible intervals (CI), selection probabilities (P) and  $2\log_e(\text{Bayes factor})$  (BF) as a measure of support for a given effect. BF-values < 2 indicate no support; values between 2 and 6 indicate positive support; values between 6 and 10 indicate strong support; and values > 10 indicate decisive support. Effects that were supported by the variable selection with  $\text{BF} > 2$  are highlighted with an asterisk. The  $r^2$  values depict the marginal ( $r_m^2$ ) variance explained by fixed factors only as well as the conditional ( $r_c^2$ ) variance explained by fixed and random factors combined<sup>4</sup>. Note that the results are virtually identical to the results based on fruit consumption rate per hour (see Table 2 in main text).

**Supplementary Table 4. Summary of Bayesian hierarchical structural equation model in which the migratory distance outside the migration and pre-migration period was not set to zero (alternative model 1).**

| Response ~ predictor                           | Effect (95% CI)     | P    | BF   | Response ~ predictor                                                 | Effect (95% CI)     | P    | BF    |
|------------------------------------------------|---------------------|------|------|----------------------------------------------------------------------|---------------------|------|-------|
| $x \sim$<br>( $r_m^2 = 0.0018, r_c^2 = 0.75$ ) |                     |      |      | $\text{Lipid intake} \sim$<br>( $r_m^2 = 0.14, r_c^2 = 0.78$ )       |                     |      |       |
| Partner diversity                              | -0.01 (-0.2, 0.04)  | 0.21 | -2.7 | Partner diversity                                                    | 0.04 (-0.02, 0.2)   | 0.37 | -1.1  |
| Interaction strength                           | 0.008 (-0.05, 0.1)  | 0.18 | -3.0 | Interaction strength                                                 | 0.09 (0, 0.3)       | 0.59 | 0.69  |
| Migratory distance                             | 0.009 (-0.06, 0.1)  | 0.22 | -2.6 | Migratory distance                                                   | -0.002 (-0.1, 0.09) | 0.18 | -3.1  |
|                                                |                     |      |      | $x$                                                                  | 7e-04 (-0.1, 0.1)   | 0.19 | -2.9  |
|                                                |                     |      |      | $y$                                                                  | 0.3 (0.1, 0.4)      | 0.99 | 8.6*  |
|                                                |                     |      |      | $z$                                                                  | -0.02 (-0.2, 0.03)  | 0.21 | -2.6  |
|                                                |                     |      |      | $a$                                                                  | 0.4 (0.3, 0.6)      | 1.0  | 15*   |
| $y \sim$<br>( $r_m^2 = 0.02, r_c^2 = 0.78$ )   |                     |      |      | $\text{Sugar intake} \sim$<br>( $r_m^2 = 0.094, r_c^2 = 0.62$ )      |                     |      |       |
| Partner diversity                              | -0.1 (-0.3, 0)      | 0.63 | 1.1  | Partner diversity                                                    | 0.06 (-0.02, 0.3)   | 0.39 | -0.92 |
| Interaction strength                           | 0.009 (-0.1, 0.2)   | 0.24 | -2.3 | Interaction strength                                                 | -0.03 (-0.3, 0.05)  | 0.28 | -1.8  |
| Migratory distance                             | 0.1 (0, 0.4)        | 0.63 | 1.1  | Migratory distance                                                   | 0.007 (-0.1, 0.2)   | 0.21 | -2.6  |
|                                                |                     |      |      | $x$                                                                  | -0.1 (-0.6, 0.01)   | 0.49 | -0.08 |
|                                                |                     |      |      | $y$                                                                  | -0.08 (-0.4, 0.02)  | 0.46 | -0.29 |
|                                                |                     |      |      | $z$                                                                  | -0.07 (-0.5, 0.1)   | 0.37 | -1.0  |
|                                                |                     |      |      | $a$                                                                  | -0.4 (-0.6, -0.2)   | 1.0  | >15*  |
| $z \sim$<br>( $r_m^2 = 0.012, r_c^2 = 0.6$ )   |                     |      |      | $\text{Protein intake} \sim$<br>( $r_m^2 = 0.041, r_c^2 = 0.79$ )    |                     |      |       |
| Partner diversity                              | 0.001 (-0.1, 0.1)   | 0.19 | -2.9 | Partner diversity                                                    | -0.04 (-0.3, 0.03)  | 0.33 | -1.4  |
| Interaction strength                           | -0.01 (-0.2, 0.06)  | 0.21 | -2.6 | Interaction strength                                                 | 8e-04 (-0.1, 0.1)   | 0.18 | -3.0  |
| Migratory distance                             | -0.09 (-0.3, 0.005) | 0.52 | 0.18 | Migratory distance                                                   | -0.004 (-0.1, 0.07) | 0.18 | -3.0  |
|                                                |                     |      |      | $x$                                                                  | 0.1 (0, 0.5)        | 0.53 | 0.22  |
|                                                |                     |      |      | $y$                                                                  | 0.3 (0.1, 0.5)      | 0.99 | 8.4*  |
|                                                |                     |      |      | $z$                                                                  | 0.05 (-0.1, 0.4)    | 0.37 | -1.1  |
|                                                |                     |      |      | $a$                                                                  | 0.02 (-0.04, 0.2)   | 0.27 | -2.0  |
| $a \sim$<br>( $r_m^2 = 0.12, r_c^2 = 0.69$ )   |                     |      |      | $\text{Anthocyanin intake} \sim$<br>( $r_m^2 = 0.46, r_c^2 = 0.86$ ) |                     |      |       |
| Partner diversity                              | 0.4 (0.2, 0.5)      | 1.0  | >15* | Partner diversity                                                    | 0.08 (0, 0.2)       | 0.70 | 1.7   |
| Interaction strength                           | -0.01 (-0.2, 0.06)  | 0.21 | -2.7 | Interaction strength                                                 | 0.01 (-0.01, 0.1)   | 0.24 | -2.3  |
| Migratory distance                             | -0.3 (-0.5, 0)      | 0.93 | 5.3* | Migratory distance                                                   | 0.003 (-0.02, 0.06) | 0.13 | -3.8  |
|                                                |                     |      |      | $x$                                                                  | 0.4 (0.1, 0.6)      | 0.98 | 8.3*  |
|                                                |                     |      |      | $y$                                                                  | 0.3 (0.2, 0.5)      | 1.0  | >15*  |
|                                                |                     |      |      | $z$                                                                  | 0.6 (0.3, 0.8)      | 1.0  | >15*  |
|                                                |                     |      |      | $a$                                                                  | -0.7 (-0.9, -0.6)   | 1.0  | >15*  |

The structural equation model tested for direct and indirect effects of the partner diversity and interaction strength of frugivores in the networks and their migratory distance on the colour profile of consumed fruits (i.e., chromatic colour components ( $x, y, z$ ) and the brightness ( $a$ ) in avian colour space; see Methods) and on the mean intake of particular nutrients (i.e., lipid, sugar, protein, anthocyanin). The sample size was  $n_{\text{obs}} = 165$  observations across  $n_{\text{species}} = 43$  bird species,  $n_{\text{site}} = 3$  study sites and  $n_{\text{time}} = 4$  seasons. Animal phylogeny, species, site and season were included as random factors. Given are posterior means (with shrinkage), 95% credible intervals (CI), selection probabilities (P) and  $2\log_e(\text{Bayes factor})$  (BF) as a measure of support for a given effect. Effects that were supported by the variable selection with  $\text{BF} > 2$  are highlighted with an asterisk. The  $r^2$  values depict the marginal ( $r_m^2$ ) variance explained by fixed factors only as well as the conditional ( $r_c^2$ ) variance explained by fixed and random factors combined<sup>4</sup>. Note that the results are consistent with the results based on the model in which the migratory distance outside the migration and pre-migration period was set to zero (see Table 2 in main text).

**Supplementary Table 5. Summary of Bayesian hierarchical structural equation model including period (migration versus non-migration) and its interaction with migratory distance (alternative model 2).**

| Response ~ predictor                             | Effect (95% CI)    | P     | BF    | Response ~ predictor                                    | Effect (95% CI)     | P     | BF     |
|--------------------------------------------------|--------------------|-------|-------|---------------------------------------------------------|---------------------|-------|--------|
| <i>x</i> ~<br>( $r_m^2 = 0.0089, r_c^2 = 0.75$ ) |                    |       |       | Lipid intake ~<br>( $r_m^2 = 0.19, r_c^2 = 0.76$ )      |                     |       |        |
| Partner diversity                                | -0.01 (-0.2, 0.05) | 0.24  | -2.3  | Partner diversity                                       | 0.04 (-0.005, 0.2)  | 0.38  | -1.0   |
| Interaction strength                             | 0.009 (-0.07, 0.2) | 0.21  | -2.7  | Interaction strength                                    | 0.08 (0, 0.3)       | 0.55  | 0.41   |
| Migratory distance                               | 0.007 (-0.05, 0.1) | 0.18  | -3.0  | Migratory distance                                      | -0.003 (-0.1, 0.08) | 0.19  | -2.9   |
| Period                                           | -0.08 (-0.8, 0.5)  | 0.51  | 0.11  | Period                                                  | 0.2 (-0.4, 0.9)     | 0.61  | 0.86   |
| Migratory dist. × period                         | -0.007 (-0.1, 0)   | 0.042 | -2.3  | Migratory dist. × period                                | -0.04 (-0.4, 0.2)   | 0.38  | 3.0*   |
|                                                  |                    |       |       | <i>x</i>                                                | -0.01 (-0.2, 0.1)   | 0.26  | -2.1   |
|                                                  |                    |       |       | <i>y</i>                                                | 0.3 (0.09, 0.4)     | 1.0   | >15*   |
|                                                  |                    |       |       | <i>z</i>                                                | -0.06 (-0.3, 0.1)   | 1.0   | >15*   |
|                                                  |                    |       |       | <i>a</i>                                                | 0.4 (0.3, 0.6)      | 1.0   | >15*   |
| <i>y</i> ~<br>( $r_m^2 = 0.022, r_c^2 = 0.78$ )  |                    |       |       | Sugar intake ~<br>( $r_m^2 = 0.1, r_c^2 = 0.64$ )       |                     |       |        |
| Partner diversity                                | -0.1 (-0.3, 0)     | 0.65  | 1.2   | Partner diversity                                       | 0.03 (-0.04, 0.3)   | 0.29  | -1.8   |
| Interaction strength                             | 0.01 (-0.1, 0.2)   | 0.26  | -2.1  | Interaction strength                                    | -0.02 (-0.2, 0.06)  | 0.28  | -1.9   |
| Migratory distance                               | 0.1 (0, 0.4)       | 0.61  | 0.91  | Migratory distance                                      | 0.005 (-0.09, 0.1)  | 0.19  | -2.9   |
| Period                                           | 0.01 (-0.5, 0.6)   | 0.45  | -0.43 | Period                                                  | 0.06 (-0.4, 0.6)    | 0.49  | -0.084 |
| Migratory dist. × period                         | 0.01 (-0.05, 0.2)  | 0.10  | -0.46 | Migratory dist. × period                                | 0.06 (-0.2, 0.5)    | 0.44  | 3.4*   |
|                                                  |                    |       |       | <i>x</i>                                                | -0.3 (-0.7, 0)      | 0.84  | 3.4*   |
|                                                  |                    |       |       | <i>y</i>                                                | -0.2 (-0.5, 0.003)  | 1.0   | 13*    |
|                                                  |                    |       |       | <i>z</i>                                                | -0.3 (-0.6, 0.1)    | 1.0   | >15*   |
|                                                  |                    |       |       | <i>a</i>                                                | -0.4 (-0.6, -0.2)   | 1.0   | 12*    |
| <i>z</i> ~<br>( $r_m^2 = 0.019, r_c^2 = 0.61$ )  |                    |       |       | Protein intake ~<br>( $r_m^2 = 0.047, r_c^2 = 0.79$ )   |                     |       |        |
| Partner diversity                                | 0 (-0.09, 0.09)    | 0.18  | -3.1  | Partner diversity                                       | -0.04 (-0.3, 0.04)  | 0.35  | -1.3   |
| Interaction strength                             | -0.01 (-0.2, 0.06) | 0.22  | -2.5  | Interaction strength                                    | 0.003 (-0.1, 0.1)   | 0.19  | -2.9   |
| Migratory distance                               | -0.09 (-0.3, 0.03) | 0.53  | 0.26  | Migratory distance                                      | -0.006 (-0.1, 0.07) | 0.20  | -2.8   |
| Period                                           | 0.1 (-0.4, 0.7)    | 0.52  | 0.13  | Period                                                  | -0.08 (-0.8, 0.4)   | 0.52  | 0.18   |
| Migratory dist. × period                         | 0.02 (-0.03, 0.3)  | 0.12  | -0.12 | Migratory dist. × period                                | -0.02 (-0.4, 0.3)   | 0.38  | 2.9*   |
|                                                  |                    |       |       | <i>x</i>                                                | 0.1 (0, 0.5)        | 0.51  | 0.11   |
|                                                  |                    |       |       | <i>y</i>                                                | 0.3 (0.1, 0.5)      | 0.99  | 8.8*   |
|                                                  |                    |       |       | <i>z</i>                                                | 0.04 (-0.1, 0.4)    | 0.31  | -1.6   |
|                                                  |                    |       |       | <i>a</i>                                                | 0.007 (0, 0.1)      | 0.087 | -4.7   |
| <i>a</i> ~<br>( $r_m^2 = 0.18, r_c^2 = 0.66$ )   |                    |       |       | Anthocyanin intake ~<br>( $r_m^2 = 0.5, r_c^2 = 0.86$ ) |                     |       |        |
| Partner diversity                                | 0.4 (0.2, 0.5)     | 1.0   | >15*  | Partner diversity                                       | 0.08 (0, 0.2)       | 0.71  | 1.8    |
| Interaction strength                             | -0.01 (-0.2, 0.07) | 0.22  | -2.5  | Interaction strength                                    | 0.01 (-0.01, 0.1)   | 0.23  | -2.5   |
| Migratory distance                               | -0.3 (-0.5, 0)     | 0.92  | 5.0*  | Migratory distance                                      | 0.003 (-0.01, 0.07) | 0.13  | -3.8   |
| Period                                           | 0.2 (-0.3, 0.9)    | 0.61  | 0.91  | Period                                                  | -0.1 (-0.6, 0.3)    | 0.56  | 0.47   |
| Migratory dist. × period                         | 0.03 (-0.1, 0.4)   | 0.23  | 1.4   | Migratory dist. × period                                | 0 (-0.2, 0.2)       | 0.28  | 2.0*   |
|                                                  |                    |       |       | <i>x</i>                                                | 0.4 (0.1, 0.6)      | 0.98  | 8.2*   |
|                                                  |                    |       |       | <i>y</i>                                                | 0.3 (0.2, 0.5)      | 1.0   | >15*   |
|                                                  |                    |       |       | <i>z</i>                                                | 0.6 (0.3, 0.8)      | 1.0   | >15*   |
|                                                  |                    |       |       | <i>a</i>                                                | -0.7 (-0.9, -0.6)   | 1.0   | >15*   |

The structural equation model tested for direct and indirect effects of the partner diversity and interaction strength of frugivores in the networks, as well as their migratory distance, period (migration versus non-migration) and its interaction with migratory distance on the colour profile of consumed fruits (i.e., chromatic colour components (*x*, *y*, *z*) and the brightness (*a*) in avian colour space; see Methods) and on the mean intake of particular nutrients (i.e., lipid, sugar, protein, anthocyanin). The sample size was  $n_{\text{obs}} = 165$  observations across  $n_{\text{species}} = 43$  bird species,  $n_{\text{site}} = 3$  study sites and  $n_{\text{time}} = 4$  seasons. Animal phylogeny, species, site and season were included as random factors. Given are posterior means (with shrinkage), 95% credible intervals (CI), selection probabilities (P) and  $2\log_e(\text{Bayes factor})$  (BF) as a measure of support for a given effect. Effects that were supported by the variable selection with  $\text{BF} > 2$  are highlighted with an asterisk. The  $r^2$  values depict the marginal ( $r_m^2$ ) variance explained by fixed factors only as well as the conditional ( $r_c^2$ ) variance explained by fixed and random factors combined<sup>4</sup>. Note that the results are consistent with the results based on the model in which the migratory distance outside the migration and pre-migration period was set to zero (see Table 2 in main text).

**Supplementary Table 6. Summary of convergence statistics for Bayesian hierarchical model testing for relationships between fruit colour and the nutrient content of fruits.**

| Predictor | Response    | PSRF  | $N_{\text{eff}}$ |
|-----------|-------------|-------|------------------|
| $x$       | lipid       | 1.005 | 2211             |
| $y$       | lipid       | 1.007 | 2186             |
| $z$       | lipid       | 1.005 | 1863             |
| $a$       | lipid       | 1.001 | 1852             |
| $x$       | sugar       | 1.006 | 2053             |
| $y$       | sugar       | 1.003 | 1949             |
| $z$       | sugar       | 1.002 | 2052             |
| $a$       | sugar       | 1.007 | 2129             |
| $x$       | protein     | 1.006 | 2225             |
| $y$       | protein     | 1.002 | 1810             |
| $z$       | protein     | 1.003 | 2071             |
| $a$       | protein     | 1.013 | 2071             |
| $x$       | anthocyanin | 1.001 | 2053             |
| $y$       | anthocyanin | 1.004 | 2102             |
| $z$       | anthocyanin | 1.013 | 1840             |
| $a$       | anthocyanin | 1.006 | 1950             |

The model tested the relationships between the chromatic colour components ( $x$ ,  $y$ ,  $z$ ) and the brightness of fruits ( $a$ ) in the avian colour space (see Methods for details) and the lipid, sugar, protein and anthocyanin concentrations in the fruit pulp (see Table 1 in main text). Plant phylogeny was included as a random factor. The sample size was  $n_{\text{species}} = 44$  plant species. Given are pairs of predictor and response variables along with the potential scale reduction factor (PSRF) and effective sample size ( $N_{\text{eff}}$ )<sup>5</sup>. Values of PSRF < 1.1 indicate that MCMC chains have converged on the same posterior distribution.  $N_{\text{eff}}$  indicates approximate sample size of posterior samples after accounting for temporal autocorrelation between posterior samples.

**Supplementary Table 7. Summary of convergence statistics for Bayesian hierarchical structural equation models testing whether the fruit choice of frugivorous birds is mediated by fruit colour and whether the birds' mean intake of particular nutrients is related to their partner diversity, interaction strength and migratory behaviour.**

| Predictor              | Response    | (a) Model in Table 2 |                  | (b) Model in Supplementary Table 3 |                  | (c) Model in Supplementary Table 4 |                  | (d) Model in Supplementary Table 5 |                  |
|------------------------|-------------|----------------------|------------------|------------------------------------|------------------|------------------------------------|------------------|------------------------------------|------------------|
|                        |             | PSRF                 | $N_{\text{eff}}$ | PSRF                               | $N_{\text{eff}}$ | PSRF                               | $N_{\text{eff}}$ | PSRF                               | $N_{\text{eff}}$ |
| Partner diversity      | <i>x</i>    | 1.007                | 2157             | 1.003                              | 1897             | 1.003                              | 2038             | 1.000                              | 2033             |
| Interaction strength   | <i>x</i>    | 1.008                | 1965             | 1.000                              | 2072             | 1.006                              | 1961             | 1.004                              | 1829             |
| Migratory distance     | <i>x</i>    | 1.006                | 1988             | 1.002                              | 2064             | 1.009                              | 2089             | 1.009                              | 1917             |
| Period                 | <i>x</i>    | -                    | -                | -                                  | -                | -                                  | -                | 1.003                              | 2000             |
| Mig. distance × period | <i>x</i>    | -                    | -                | -                                  | -                | -                                  | -                | 1.013                              | 2197             |
| Partner diversity      | <i>y</i>    | 1.022                | 1906             | 1.004                              | 2052             | 1.002                              | 2371             | 1.002                              | 1857             |
| Interaction strength   | <i>y</i>    | 1.011                | 2000             | 1.002                              | 2189             | 1.005                              | 1971             | 1.007                              | 2224             |
| Migratory distance     | <i>y</i>    | 1.005                | 1940             | 1.006                              | 1928             | 1.003                              | 2033             | 1.000                              | 1753             |
| Period                 | <i>y</i>    | -                    | -                | -                                  | -                | -                                  | -                | 1.012                              | 2048             |
| Mig. distance × period | <i>y</i>    | -                    | -                | -                                  | -                | -                                  | -                | 1.021                              | 1795             |
| Partner diversity      | <i>z</i>    | 1.008                | 2302             | 1.009                              | 2110             | 1.007                              | 2000             | 1.004                              | 2379             |
| Interaction strength   | <i>z</i>    | 1.003                | 1802             | 1.003                              | 2105             | 1.007                              | 1956             | 1.008                              | 1990             |
| Migratory distance     | <i>z</i>    | 0.999                | 2059             | 1.003                              | 2308             | 1.006                              | 1770             | 1.003                              | 2000             |
| Period                 | <i>z</i>    | -                    | -                | -                                  | -                | -                                  | -                | 1.000                              | 2000             |
| Mig. distance × period | <i>z</i>    | -                    | -                | -                                  | -                | -                                  | -                | 1.002                              | 1933             |
| Partner diversity      | <i>a</i>    | 1.006                | 2160             | 1.003                              | 1938             | 1.003                              | 2000             | 1.026                              | 2000             |
| Interaction strength   | <i>a</i>    | 1.012                | 1962             | 1.019                              | 1740             | 1.003                              | 2000             | 1.010                              | 1934             |
| Migratory distance     | <i>a</i>    | 1.003                | 1947             | 1.013                              | 1987             | 1.006                              | 2161             | 1.025                              | 2035             |
| Period                 | <i>a</i>    | -                    | -                | -                                  | -                | -                                  | -                | 1.002                              | 2103             |
| Mig. distance × period | <i>a</i>    | -                    | -                | -                                  | -                | -                                  | -                | 1.001                              | 1979             |
| Partner diversity      | lipid       | 1.003                | 1943             | 1.001                              | 2091             | 1.000                              | 1974             | 1.010                              | 1981             |
| Interaction strength   | lipid       | 1.002                | 1811             | 1.002                              | 1845             | 1.003                              | 1820             | 1.013                              | 2052             |
| Migratory distance     | lipid       | 1.005                | 2144             | 1.005                              | 2170             | 1.013                              | 2205             | 1.005                              | 2092             |
| Period                 | lipid       | -                    | -                | -                                  | -                | -                                  | -                | 1.002                              | 2073             |
| Mig. distance × period | lipid       | -                    | -                | -                                  | -                | -                                  | -                | 1.008                              | 2065             |
| <i>x</i>               | lipid       | 1.004                | 2000             | 1.007                              | 2469             | 1.003                              | 2077             | 1.009                              | 1881             |
| <i>y</i>               | lipid       | 1.003                | 1894             | 1.003                              | 2141             | 1.005                              | 2069             | 1.016                              | 1954             |
| <i>z</i>               | lipid       | 1.003                | 1811             | 1.003                              | 2000             | 1.000                              | 2293             | 1.003                              | 2116             |
| <i>a</i>               | lipid       | 1.001                | 1863             | 1.003                              | 2077             | 1.002                              | 2000             | 1.009                              | 1891             |
| Partner diversity      | sugar       | 1.004                | 2000             | 1.004                              | 2095             | 1.000                              | 1923             | 1.012                              | 1808             |
| Interaction strength   | sugar       | 1.006                | 1952             | 1.002                              | 2028             | 1.002                              | 2030             | 1.004                              | 1911             |
| Migratory distance     | sugar       | 1.012                | 2000             | 1.015                              | 2357             | 1.004                              | 2069             | 1.003                              | 1978             |
| Period                 | sugar       | -                    | -                | -                                  | -                | -                                  | -                | 1.005                              | 1849             |
| Mig. distance × period | sugar       | -                    | -                | -                                  | -                | -                                  | -                | 1.000                              | 2123             |
| <i>x</i>               | sugar       | 1.001                | 2023             | 1.006                              | 1960             | 1.027                              | 2098             | 1.010                              | 1833             |
| <i>y</i>               | sugar       | 1.004                | 2009             | 1.009                              | 1956             | 1.004                              | 2224             | 1.009                              | 2117             |
| <i>z</i>               | sugar       | 1.004                | 2119             | 1.009                              | 2014             | 1.015                              | 2056             | 1.008                              | 2133             |
| <i>a</i>               | sugar       | 1.008                | 2143             | 1.008                              | 2383             | 1.005                              | 1996             | 1.008                              | 1945             |
| Partner diversity      | protein     | 1.002                | 2314             | 1.006                              | 1958             | 1.005                              | 1841             | 1.004                              | 1831             |
| Interaction strength   | protein     | 1.007                | 2546             | 1.009                              | 2231             | 1.004                              | 1940             | 1.004                              | 2198             |
| Migratory distance     | protein     | 1.005                | 2043             | 1.006                              | 1992             | 1.011                              | 2085             | 1.004                              | 1870             |
| Period                 | protein     | -                    | -                | -                                  | -                | -                                  | -                | 1.010                              | 1957             |
| Mig. distance × period | protein     | -                    | -                | -                                  | -                | -                                  | -                | 1.002                              | 2030             |
| <i>x</i>               | protein     | 1.001                | 2116             | 1.002                              | 2055             | 1.009                              | 2009             | 1.014                              | 1932             |
| <i>y</i>               | protein     | 1.002                | 2312             | 1.013                              | 2064             | 1.005                              | 2139             | 1.004                              | 2068             |
| <i>z</i>               | protein     | 1.003                | 1990             | 1.002                              | 1908             | 1.013                              | 2000             | 1.017                              | 1935             |
| <i>a</i>               | protein     | 1.004                | 1924             | 1.012                              | 1944             | 1.005                              | 2175             | 1.004                              | 2000             |
| Partner diversity      | anthocyanin | 1.009                | 1892             | 1.001                              | 1914             | 1.001                              | 2320             | 1.002                              | 2000             |
| Interaction strength   | anthocyanin | 1.007                | 1852             | 1.003                              | 1842             | 1.003                              | 2048             | 1.012                              | 2000             |
| Migratory distance     | anthocyanin | 1.006                | 1947             | 1.001                              | 2000             | 1.005                              | 1992             | 1.005                              | 1932             |
| Period                 | anthocyanin | -                    | -                | -                                  | -                | -                                  | -                | 1.008                              | 2165             |
| Mig. distance × period | anthocyanin | -                    | -                | -                                  | -                | -                                  | -                | 1.009                              | 1967             |
| <i>x</i>               | anthocyanin | 1.003                | 2008             | 1.002                              | 1890             | 1.001                              | 2457             | 1.001                              | 2345             |
| <i>y</i>               | anthocyanin | 1.003                | 1966             | 1.003                              | 2099             | 1.009                              | 1944             | 1.002                              | 2111             |
| <i>z</i>               | anthocyanin | 1.004                | 2041             | 1.003                              | 1906             | 1.000                              | 2203             | 1.003                              | 2219             |
| <i>a</i>               | anthocyanin | 1.005                | 1933             | 1.001                              | 1922             | 1.004                              | 1761             | 1.001                              | 1992             |

The models in (a-d) tested for direct and indirect effects of the partner diversity and interaction strength of frugivores in the networks and their migratory distance on the colour profile of consumed fruits (i.e., chromatic colour components (*x*, *y*, *z*) and the brightness (*a*) in avian colour space; see Methods) and on the mean intake of particular nutrients (i.e., lipid, sugar, protein, anthocyanin). Each model was based on different assumptions (see the summary table of each model for details). The sample size was  $n_{\text{obs}} = 165$  observations across  $n_{\text{species}} = 43$  bird species,  $n_{\text{site}} = 3$  study sites and  $n_{\text{time}} = 4$  seasons. Animal phylogeny, species, site and season were included as random factors. Given are pairs of predictor and response variables along with the potential scale reduction factor (PSRF) and effective sample size ( $N_{\text{eff}}$ )<sup>5</sup>. Values of PSRF < 1.1 indicate that MCMC chains have converged on the same posterior distribution.  $N_{\text{eff}}$  indicates approximate sample size of posterior samples after accounting for temporal autocorrelation between posterior samples.



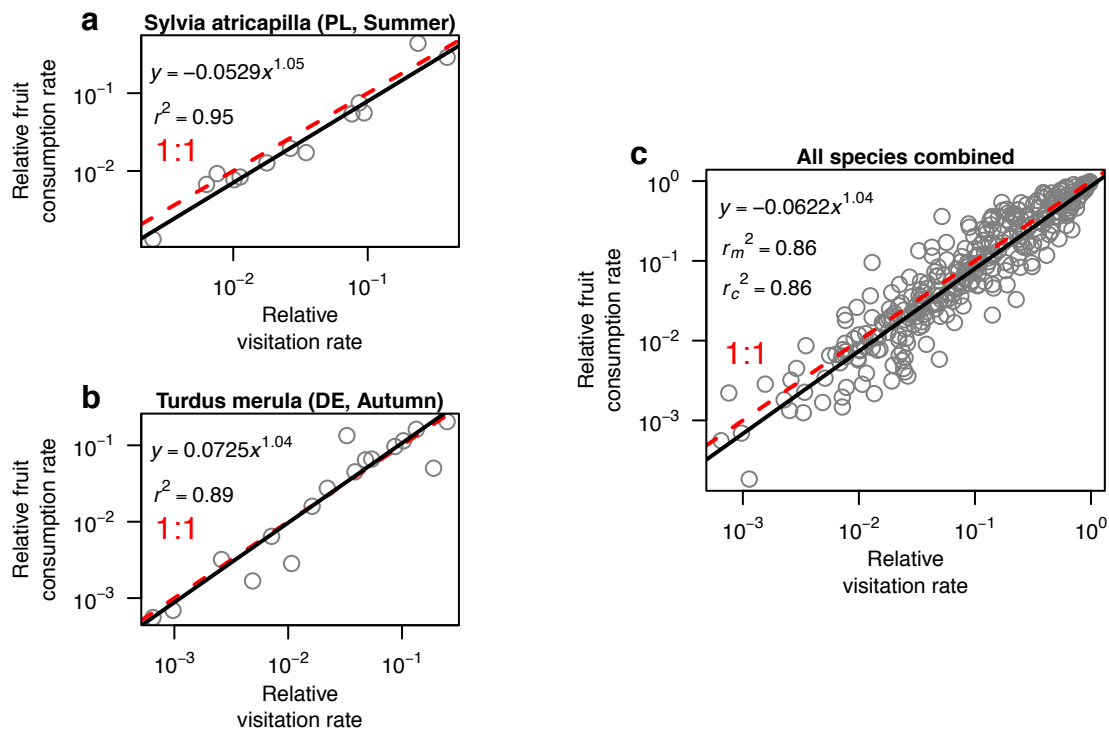

**Supplementary Figure 1. Relationship between relative visitation and relative fruit consumption rate of frugivores on different plant species per hour based on data from Albrecht *et al.*<sup>1</sup> and Stiebel & Bairlein<sup>2</sup> for which fruit consumption rates per visit were available. (a,b) Example relationships between the relative visitation and relative fruit consumption rate shown for (a) *Sylvia atricapilla* (blackcap) in a summer network from Poland (PL) and (b) *Turdus merula* (blackbird) in an autumn network from Germany (DE). Sample sizes in (a,b) are  $n_{\text{species}} = 13$  and  $n_{\text{species}} = 17$  plant species on which the two bird species were recorded during foraging, respectively. The black lines in (a,b) are the estimated relationships from simple linear regressions of the form  $\log(y) \sim a + b \times \log(x)$ , where  $x$  is the relative visitation rate of the frugivore species on the plant species in a given network,  $y$  is the relative fruit consumption rate on these plant species,  $a$  is the intercept and  $b$  is the slope. (c) Relationship between the relative visitation and relative fruit consumption rate based on all frugivore species. The black line in (c) is the estimated relationship from a linear mixed effects model of the form:  $\log(y) \sim a + b \times \log(x) + (1|\text{frugivore species}) + (1|\text{network})$ , where  $x$ ,  $y$ ,  $a$  and  $b$  are defined as above and frugivore species and network id are random factors. The sample size in (c) was  $n_{\text{obs}} = 313$  observations across  $n_{\text{species}} = 28$  frugivore species and  $n_{\text{network}} = 6$  networks. Only frugivore species that were recorded on at least two plant species in a given network were included in the analysis. The  $r^2$  values in (c) depict the marginal ( $r_m^2$ ) variance explained by fixed factors only as well as the conditional ( $r_c^2$ ) variance explained by fixed and random factors combined<sup>4</sup>. Note that the estimated relationship between relative visitation and fruit consumption rate per hour based on all frugivore species in (c) is statistically indistinguishable from a 1:1 relationship (i.e., the intercept does not differ from zero:  $a = -0.062$ ,  $z = -0.77$ ,  $n = 313$ ,  $P = 0.44$ ; and the slope does not differ from one:  $b = 1.04$ ,  $z = 1.49$ ,  $n = 313$ ,  $P = 0.14$ ). This indicates that the relative contribution of a plant species to the diet of a frugivore species is the same regardless of whether fruit consumption or visitation rates per hour are used to estimate interaction frequency. This is due to the fact that the comparatively large variation in the visitation rates of a frugivore species across different plant species overrides the comparatively small variation in the fruit consumption rate per visit of that frugivore species on each of the plant species<sup>6</sup>. The red dashed line in (a,b,c) represents the 1:1 line.**

### Supplementary References

1. Albrecht, J. *et al.* Variation in neighbourhood context shapes frugivore-mediated facilitation and competition among co-dispersed plant species. *Journal of Ecology* **103**, 526–536 (2015).
2. Stiebel, H. & Bairlein, F. Frugivorie mitteleuropäischer Vögel I: Nahrung und Nahrungserwerb. *Vogelwarte* **46**, 1–23 (2008).
3. Snow, B. K. & Snow, D. *Birds and berries: a study of an ecological interaction*. (T & A D Poyser, 1988).
4. Nakagawa, S. & Schielzeth, H. A general and simple method for obtaining  $R^2$  from generalized linear mixed-effects models. *Methods in Ecology and Evolution* **4**, 133–142 (2013).
5. Plummer, M., Best, N., Cowles, K. & Vines, K. CODA: convergence diagnosis and output analysis for MCMC. *R News* **6**, 7–11 (2006).
6. Vázquez, D. P., Morris, W. F. & Jordano, P. Interaction frequency as a surrogate for the total effect of animal mutualists on plants. *Ecology Letters* **8**, 1088–1094 (2005).
